# Supplementary material for: Multiphoton photoelectron emission microscopy of single Au nanorods: combined experimental and theoretical study of rod morphology and dielectric environment on localized surface plasmon resonances
Source: Royal Society of Chemistry journal article supplement (doi:10.1039/c3cp44385j), 2013-01-01
Supplement: c3cp44385j.pdf [file c3cp44385j.pdf]

## **SUPPLEMENTARY INFORMATION**

### **Multiphoton Photoelectron Emission Microscopy of Single Au Nanorods: Combined Experimental and Theoretical Study of Rod Morphology and Dielectric Environment on Localized Surface Plasmon Resonances**

**Andrej Grubisic, Volker Schweikhard, Thomas A. Baker and David J. Nesbitt\***

*JILA, University of Colorado and National Institute of Standards and Technology, and  
Department of Chemistry and Biochemistry, University of Colorado, Boulder, Colorado 80309-  
0440*

**S1: Ellipsometric data for the ITO-coated glass coverslips**

### S1: Ellipsometric data for the ITO-coated glass coverslips

Three ITO-coated glass coverslip samples are studied with VASE® ellipsometer (J.A. Woollam Co., Inc.). Measured ellipsometric parameters  $\Psi$  and  $\Delta$  as a function of wavelength and angle of incidence for the three samples are shown in Figures S1-S3.

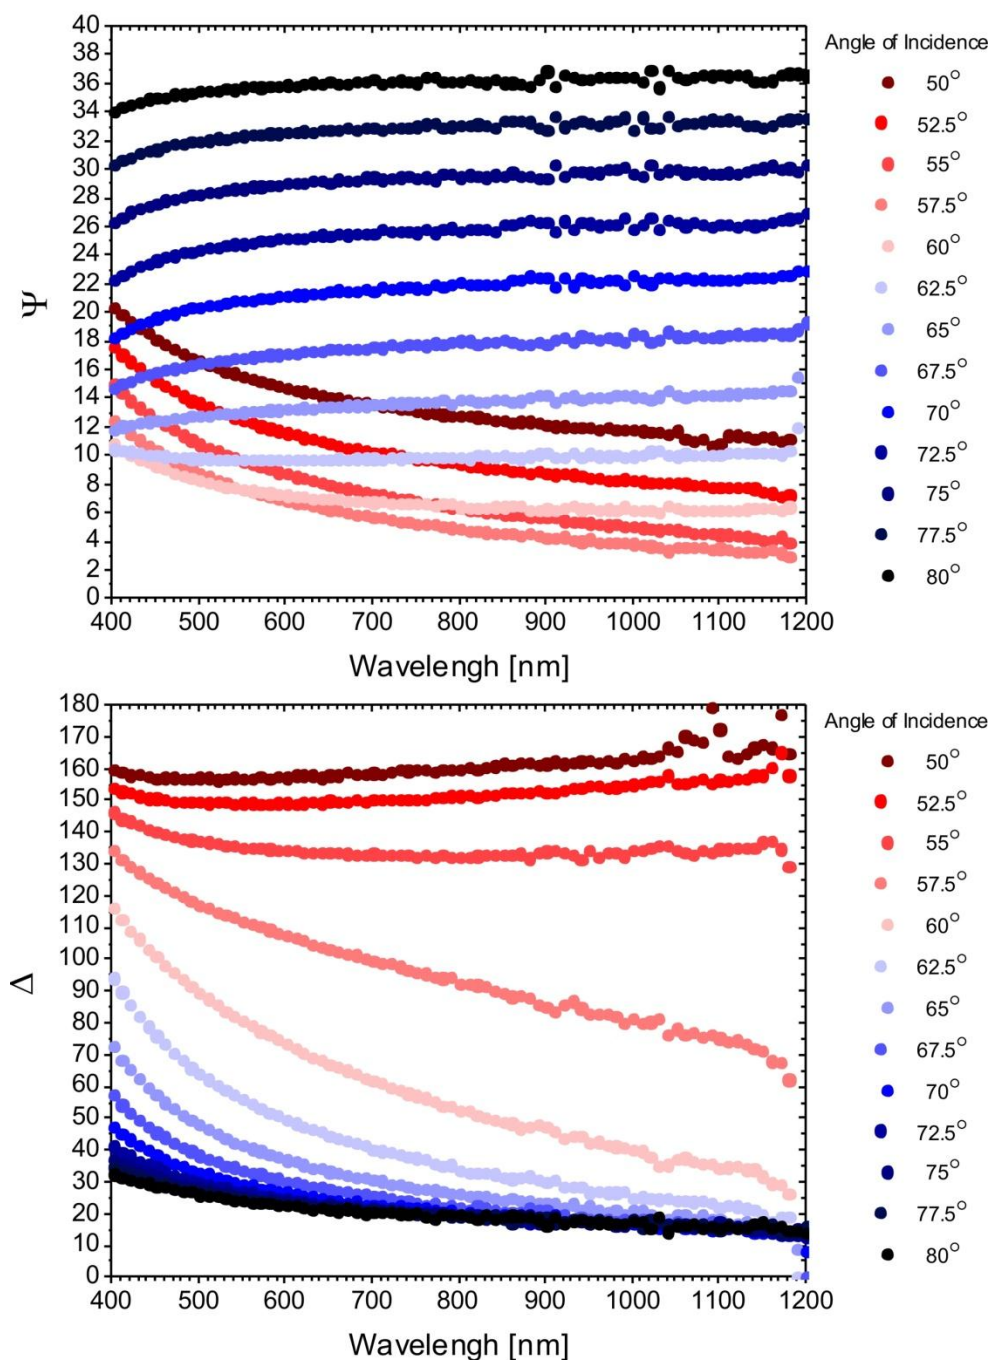

**Figure S1.** Ellipsometric parameters  $\Psi$  and  $\Delta$  as a function of wavelength and angle of incidence for ITO-coated coverslip sample 1.

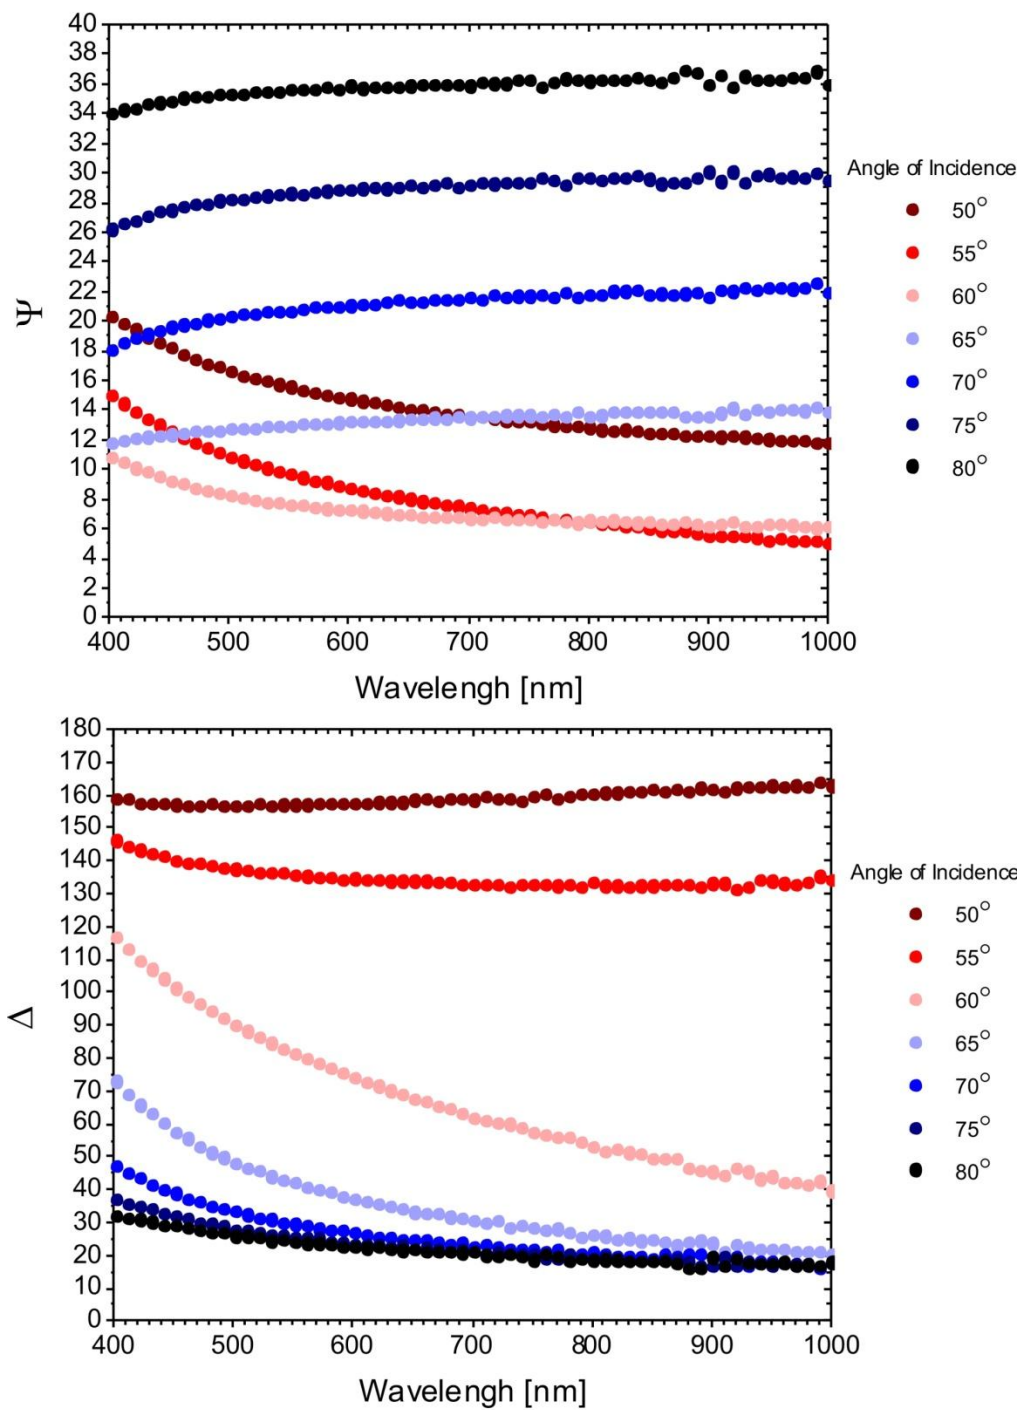

**Figure S2.** Ellipsometric parameters  $\Psi$  and  $\Delta$  as a function of wavelength and angle of incidence for ITO-coated coverslip sample 2.

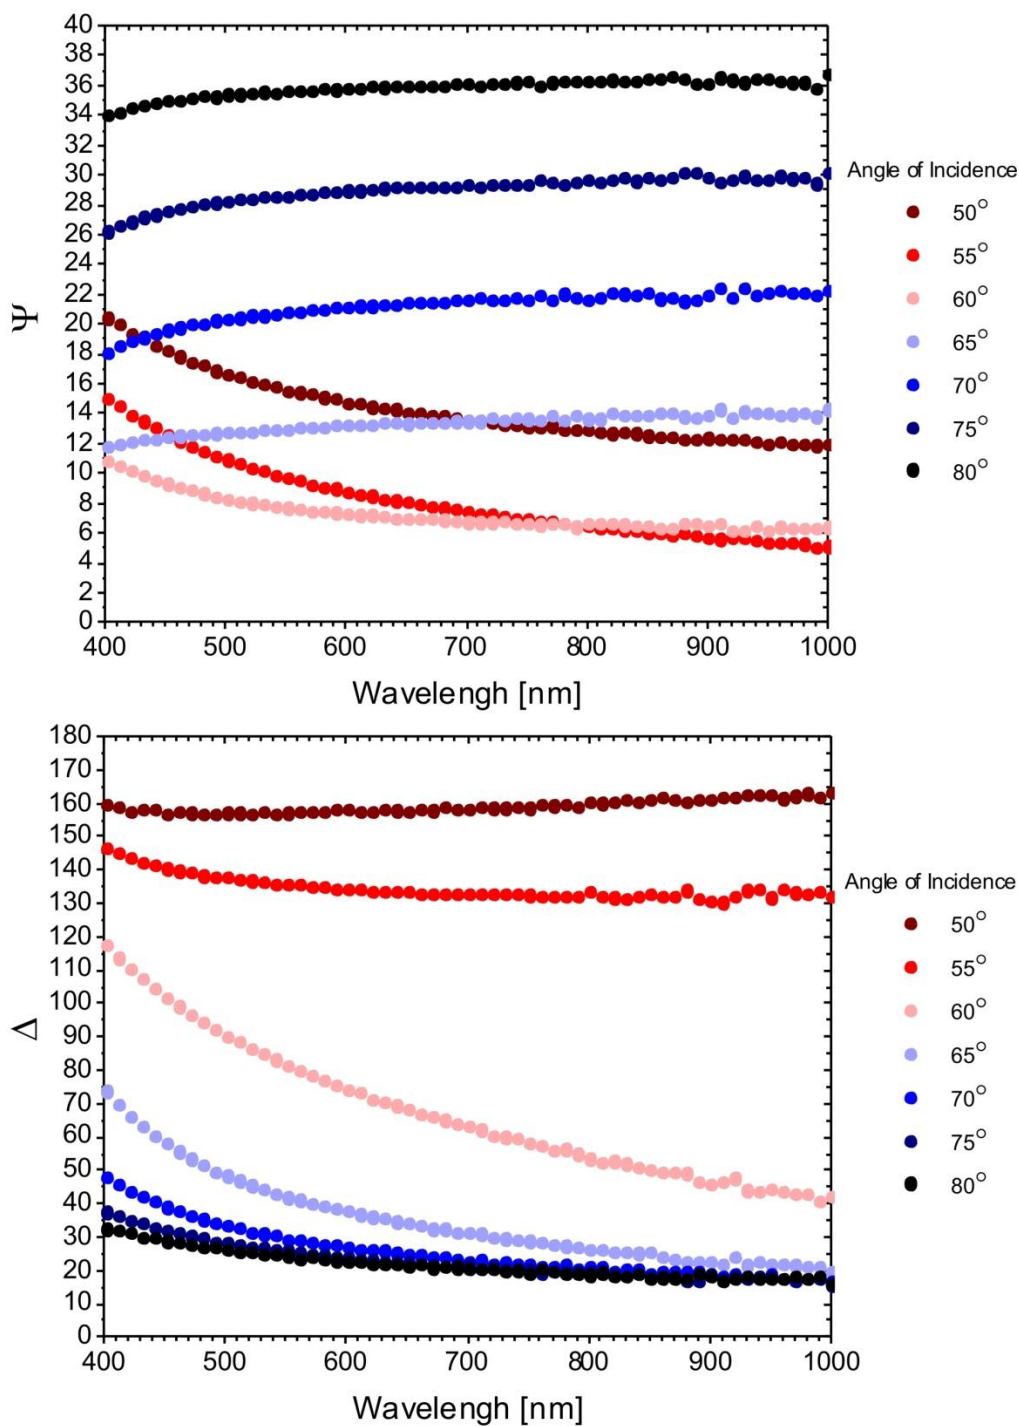

**Figure S3.** Ellipsometric parameters  $\Psi$  and  $\Delta$  as a function of wavelength and angle of incidence for ITO-coated coverslip sample 3.
